# Supplementary material for: An architectural role of specific RNA–RNA interactions in oskar granules
Source: Springer Nature journal article supplement (doi:10.1038/s41556-024-01519-3), 2024-10-01

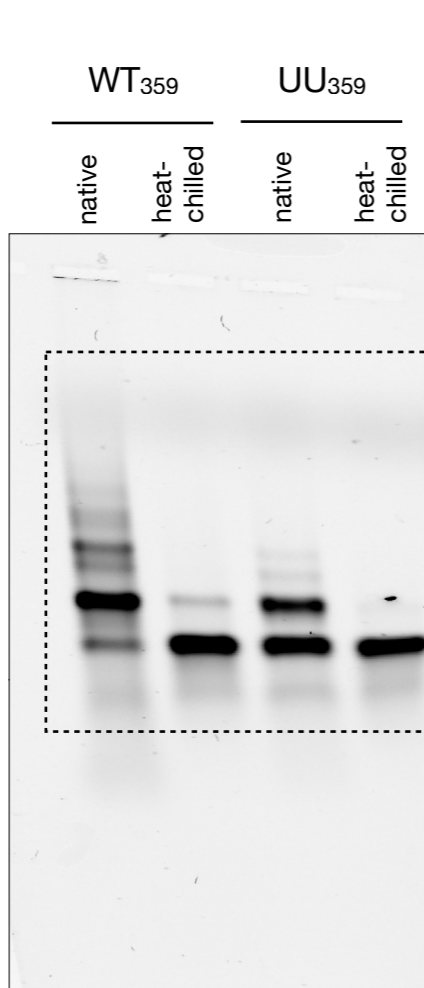

Fig. 2a

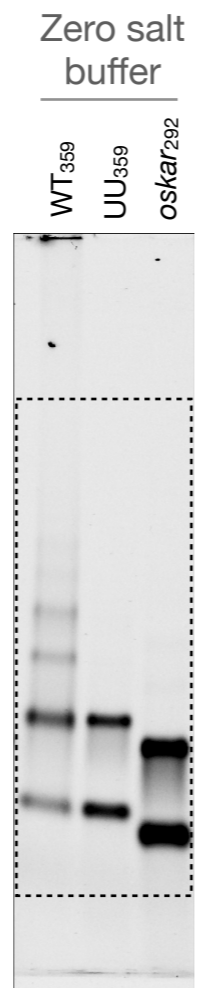

Fig. 2c

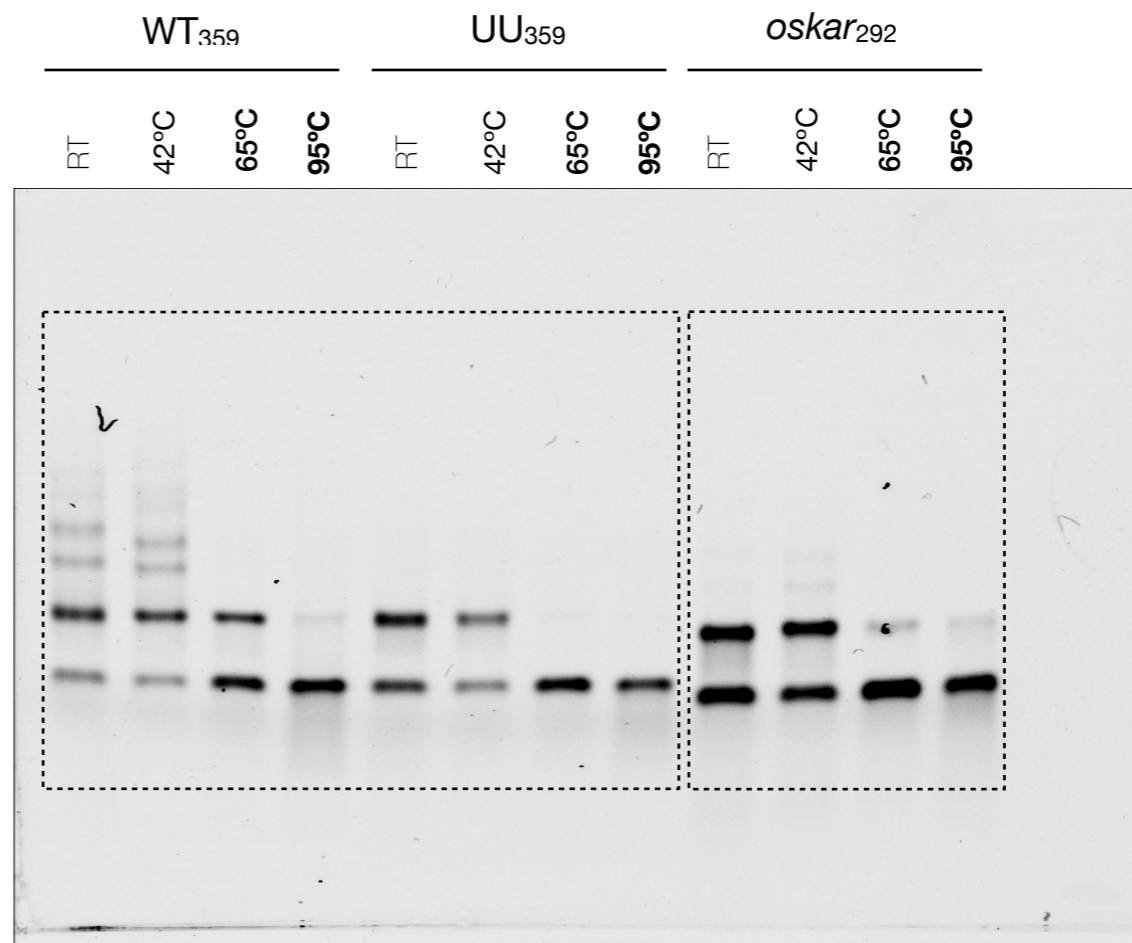

Supplement: 41556_2024_1519_MOESM6_ESM.pdf [file 41556_2024_1519_MOESM6_ESM.pdf]
