# Supplementary material for: An architectural role of specific RNA–RNA interactions in oskar granules
Source: Springer Nature journal article supplement (doi:10.1038/s41556-024-01519-3), 2024-10-01
Supplement: 41556_2024_1519_MOESM13_ESM.pdf [file 41556_2024_1519_MOESM13_ESM.pdf]

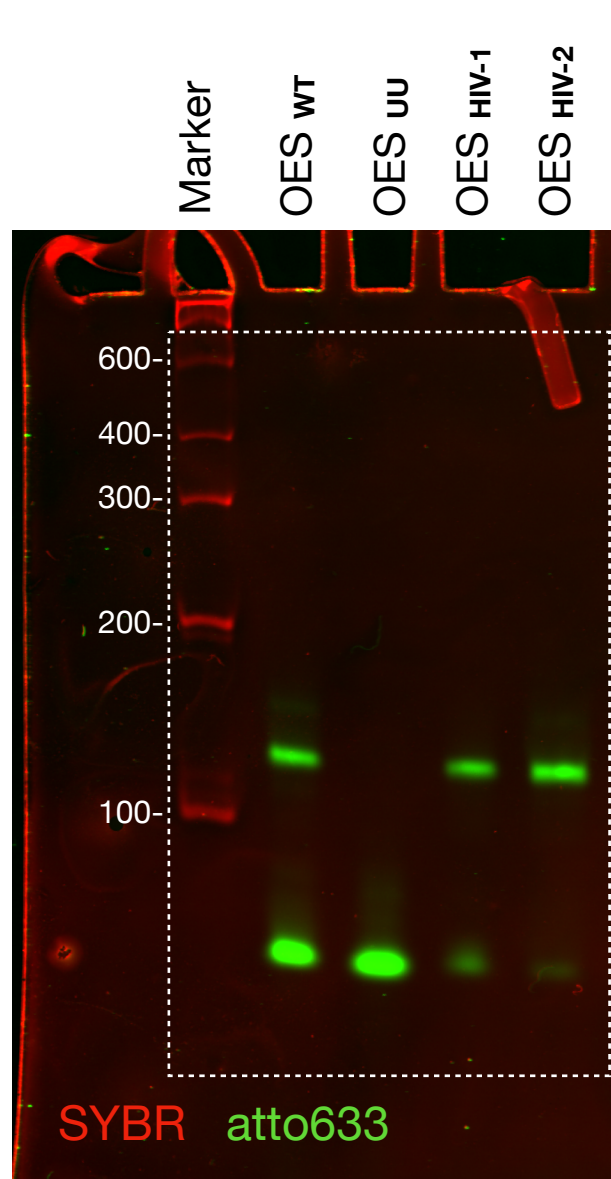

Extended Data Fig. 1a

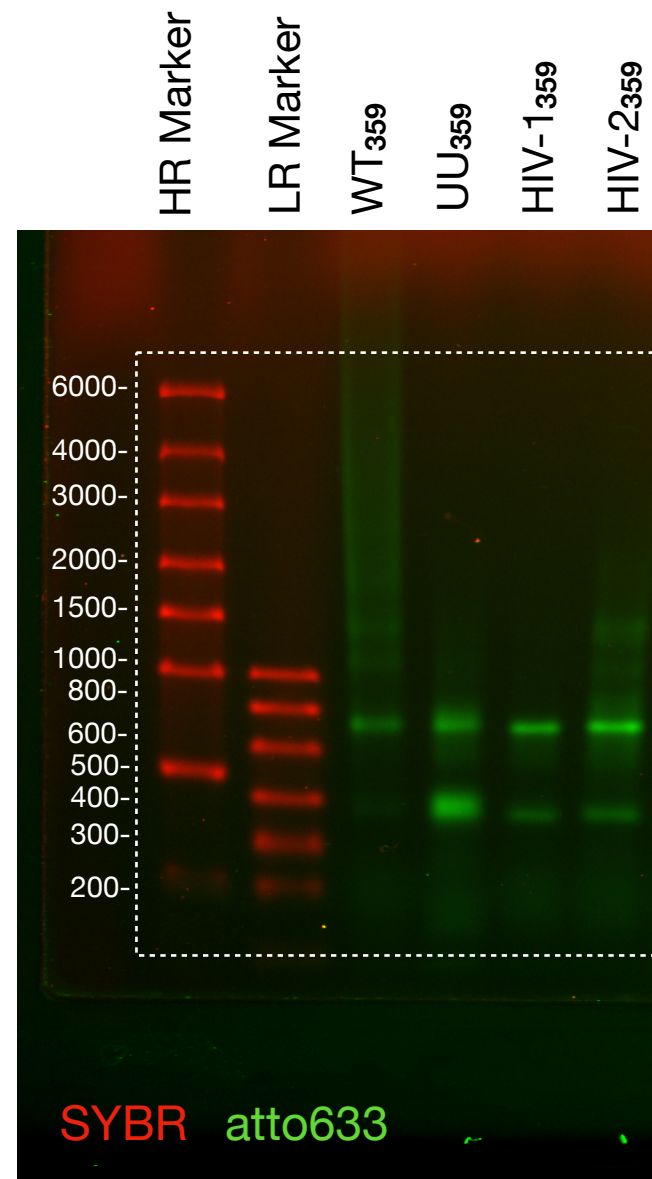

Extended Data Fig. 1b

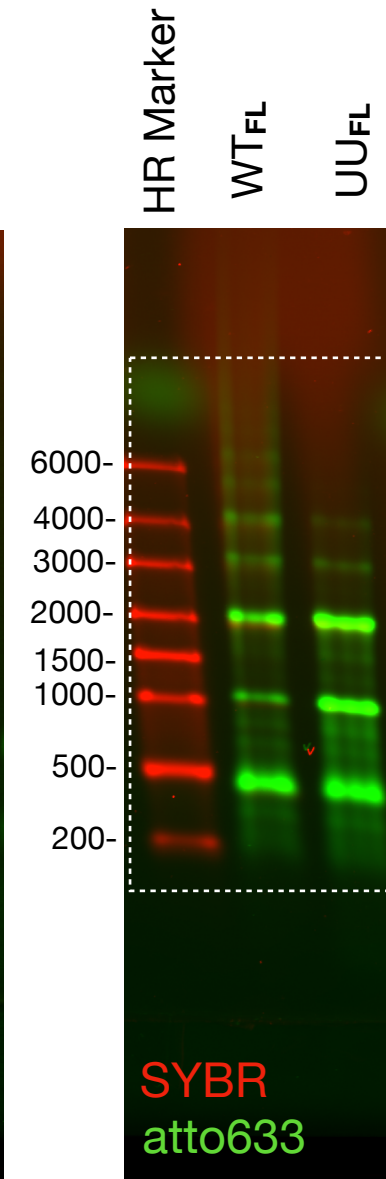

Extended Data Fig. 1c
